## **Myofiber stretch induces tensile and shear deformation of muscle stem cells in their native niche**

Mohammad Haroon<sup>1</sup>, Jenneke Klein-Nulend<sup>2</sup>, Astrid D. Bakker<sup>2</sup>, Jianfeng Jin<sup>2</sup>, Carla Offringa<sup>1</sup>,  
Fabien Le Grand<sup>3</sup>, Lorenzo Giordani<sup>4</sup>, Karen J. Liu<sup>5</sup>, Robert D. Knight<sup>5</sup>, Richard T. Jaspers<sup>1</sup>

<sup>1</sup> Laboratory for Myology, Faculty of Behavioural and Movement Sciences, Vrije Universiteit  
Amsterdam, Amsterdam Movement Sciences, 1081 HZ Amsterdam, The Netherlands

<sup>2</sup> Department of Oral Cell Biology, Academic Centre for Dentistry Amsterdam, University of  
Amsterdam and Vrije Universiteit Amsterdam, Amsterdam Movement Sciences, 1081 LA  
Amsterdam, The Netherlands

<sup>3</sup> Faculty of Medicine and Pharmacy, NeuroMyoGène UCBL, CNRS UMR 5310, INSERM  
U1217, 69008 Lyon, France

<sup>4</sup> Sorbonne Université, INSERM UMRS974, Center for Research in Myology, 75013 Paris,  
France

<sup>5</sup> Centre for Craniofacial and Stem Cell Biology, Guy's Hospital, King's College London,  
London SE1 9RT, UK

### **Contact information**

Richard T. Jaspers, PhD

Faculty of Behavioural and Movement Sciences

Vrije Universiteit Amsterdam

Laboratory for Myology

Amsterdam Movement Sciences

De Boelelaan 1108

1081 HZ Amsterdam

The Netherlands

tel: +31 (0)205988463

email: r.t.jaspers@vu.nl

### **E-mail addresses of all authors**

|                 |                                   |
|-----------------|-----------------------------------|
| M. Haroon       | n.i.l.haroon@vu.nl                |
| J. Klein-Nulend | j.kleinnulend@acta.nl             |
| A.D. Bakker     | a.bakker@acta.nl                  |
| J. Jin          | j.jin@acta.nl                     |
| C. Offringa     | c.offringa@vu.nl                  |
| F. Le Grand     | fabien.le-grand@inserm.fr         |
| L. Giordani     | lorenzo.giordani@courriel.upmc.fr |
| K.J. Liu        | karen.liu@kcl.ac.uk               |
| R.D. Knight     | robert.knight@kcl.ac.uk           |
| R.T. Jaspers    | r.t.jaspers@vu.nl                 |



## ABSTRACT

**Background:** Muscle stem cells (MuSCs) are requisite for skeletal muscle regeneration and homeostasis. Proper functioning of MuSCs, including activation, proliferation, and fate decision, is determined by an orchestrated series of events and communication between MuSCs and their niche consisting of the host myofiber and neighbouring cells. A multitude of biochemical stimuli are known to regulate fate and function of MuSCs. However, in addition to biochemical factors, it is conceivable that MuSCs residing between basal lamina and sarcolemma of myofibers are subjected to mechanical forces during muscle stretch-shortening cycles due to myofascial connections between MuSCs and myofibers. MuSCs have been shown to respond to mechanical forces *in vitro* but it remains to be proven whether physical forces are also exerted on MuSCs in their native niche and whether they contribute to the functioning and fate of MuSCs.

**Methods:** MuSCs deformation in their native niche resulting from mechanical loading of *ex vivo* myofiber bundles were visualized utilizing *mT/mG* double-fluorescent Cre-reporter mouse and multiphoton microscopy. MuSCs were subjected to 1 hour pulsating fluid shear stress with a peak shear stress rate of 8.8 Pa/s. After treatment, nitric oxide and mRNA expression levels of genes involved in regulation of MuSC proliferation and differentiation were determined.

**Results:** *Ex vivo* stretching of extensor digitorum longus and soleus myofiber bundles caused compression as well as tensile and shear deformation of MuSCs in their niche. MuSCs responded to pulsating fluid shear stress *in vitro* with increased nitric oxide production and an upward trend in *iNOS* mRNA levels, while *nNOS* expression was unaltered. Pulsating fluid shear stress enhanced gene expression of *c-Fos*, *Cdk4*, and *IL-6*, while expression of *Wnt1*, *MyoD*, *Myog*, *Wnt5a*, *COX2*, *Rspo1*, *Vangl2*, *Wnt10b*, and *MGF* remained unchanged.

**Conclusions:** We conclude that MuSCs in their native niche are subjected to force-induced deformations due to myofiber stretch-shortening. Moreover, MuSCs are mechanoresponsive as

evident by pulsating fluid shear stress-mediated expression of factors by MuSCs known to promote proliferation.

**Keywords:** Mechanical force; Muscle stem cell; Satellite cell; Myoblast; Tensile stress; Shear stress; Pressure; Myofiber stretch

## **BACKGROUND**

Skeletal muscle regeneration requires activation and proliferation of muscle stem cells (MuSCs). During organismal aging, the number of MuSCs is reduced and MuSCs lose their proliferation potential [1]. Moreover, muscle pathologies characterized by impaired regeneration by MuSCs lead to atrophy and fibrosis [2]. In young, un-injured muscles, myofiber hypertrophy is accompanied by MuSC activation, proliferation, and subsequent fusion with the host myofiber to increase myonuclei numbers [3]. This ensures that the myonuclear domain does not exceed a critical size [3]. Understanding the mechanisms underlying MuSC function is required for adequate strategies to maintain MuSC self-renewal and regenerative function.

During regeneration a multitude of growth factors and cytokines are secreted by myofibers, neighboring immune cells, and fibroblasts, which activate MuSCs and stimulate proliferation, differentiation, and self-renewal [4]. During strenuous exercise, myofibers are subjected to large stretch-shortening deformations by active contraction of myofibers and passive external loads applied to myofibers from antagonist muscle activity. Such mechanical loading stimulates the expression of growth factors and cytokines within the myofiber micro-environment [5]. These growth factors and cytokines act in a paracrine or endocrine manner on the MuSCs and thus regulate their function [4, 6]. This indicates that mechanical loads are essential for MuSC regenerative function, but little is known about how MuSCs themselves respond to mechanical force *in vivo*.

Skeletal muscle fibers have the ability to sense mechanical cues via transmembrane complexes and stretch-activated calcium ( $\text{Ca}^{2+}$ ) channels [5]. Three dimensional (3D)-finite element modeling of muscle revealed that global strain application onto a muscle *in vivo* causes high local tensile strains within the extracellular matrix (ECM) [7]. The contractile apparatus within the myofiber is also exerting force laterally [8], and finite element modeling suggests that these lateral forces cause shear deformations of the ECM by slippage along a plane parallel to the imposed stress [9]. These shear forces could also be transmitted to the MuSCs, which are anchored to the sarcolemma of the myofiber by cadherins, and on their apical side to the basal lamina of the endomysium via glycocalyx, integrins, syndecans, dystroglycans, and sarcoglycans [10]. Therefore it has been suggested that MuSCs experience tensile strain and shear stress following muscle tissue contraction [11]. Whether MuSCs within their native niche are subjected to mechanical forces resulting in cell deformation is unknown. In this study, we tested whether physical load induces deformation of MuSCs in their native niche using isolated mouse myofiber bundles containing an intact endomysium and basal lamina. We were able to show that upon myofiber bundle stretch, the MuSCs undergo substantial shear and tensile strain deformation.

Since MuSCs in their niche are mechanically loaded, the question arises whether they are able to respond to mechanical loads by changing the expression of factors involved in MuSC self-renewal, proliferation, and differentiation. Mechanical loading of myofibers has been shown to increase nitric oxide (NO) production and regulate NO synthase (NOS) expression and activity [12]. Pulsating fluid shear stress (PFSS) increases NO production and expression of interleukin-6 (*IL-6*) and cyclooxygenase-2 (*COX2*) in myotubes [13]. NO plays a role in Vang-like protein 2 (*Vangl2*) expression in MuSCs resulting in enhanced MuSC self-renewal during skeletal muscle regeneration [14]. Non-canonical Wnt signaling plays a crucial role in muscle regeneration [15], and mechanical loading is known to activate Wnt signaling in bones [16]. Mechanical cues, such as tensile strain and shear stress, constitute a physiologically relevant

and novel mechanism that can therefore potentially activate Wnt/planar cell polarity (PCP) signaling, thereby promoting MuSC self-renewal. Whether mechanical forces do induce strain and stress onto MuSCs in muscle has yet to be explored. We therefore investigated whether mechanical loads on MuSCs induce NO production and expression of biochemical factors that are crucial for MuSC regenerative function.

## **METHODS**

### **Transgenic mice and myofiber bundle isolation**

Animal procedures were conducted according to UK Home Office project license P8D5E2773 (KJL). Paired box 7 (Pax7) creERT2 mice (Jackson strain: Pax7<sup>tm2.1(cre/ERT2)Fan</sup>) on a mixed C57BL6/CD1 background were crossed with *mTmG* reporter mice (Jackson strain: Gt(ROSA)26Sor<sup>tm4(ACTB-tdTomato,-EGFP)Lox</sup>). Targeted deletion in the CreERT animals was performed by intraperitoneal tamoxifen injection (150 mg/kg body weight) at 40 and 20 h prior to euthanasia. Twenty mg/ml tamoxifen solution was prepared by dissolving 10 mg tamoxifen in 100  $\mu$ l 100% ethanol and adding 900  $\mu$ l corn oil. Compound heterozygous transgenic mice (15-17 months, n=3) were used for *in situ* mechanical loading of MuSCs and image acquisition as described below. Mice were sacrificed, and extensor digitorum longus (EDL) and soleus (SO) muscles extracted. Both EDL and SO muscles were dissected for isolation of myofiber bundles, consisting of ~20 myofibers, using fine-tipped forceps and scissors under a dark field illuminated microscope.

### **Primary MuSC isolation and fluorescence-activated cell sorting**

Primary MuSCs were isolated from hindlimb muscles (hamstring muscle group, quadriceps, tibialis, extensor digitorum longus, gastrocnemius, soleus, gluteus) of young male C57BL/6J mice (age: 2 months; n=4). Muscles were carefully dissected to remove fat and connective

tissue, transferred to a sterile petri dish on ice, and mulched into a smooth pulp followed by 17 min incubation at 37°C in collagenase B/dispase II/CaCl<sub>2</sub> solution (1.5 U/ml/2.4 U/ml/2 M in Dulbecco's Modified Eagle's Medium (DMEM; Roche, Boulogne-Billancourt, France)). The muscle pulp was triturated with a heat polished glass Pasteur pipettes, and this incubation/trituration step was repeated. Tissue digestion was stopped by adding fetal bovine serum (FBS). Cells were filtered through a 70 µm filter (Falcon<sup>®</sup>, Corning, NY, USA) and washed twice with phosphate-buffered saline (PBS). Erythrocytes were removed with the Red Blood Cell Lysing Buffer Hybri-Max (Sigma-Aldrich, Saint-Quentin-Fallavier, France). Cells were stained by anti-mouse α-7 integrin-APC (1/200; produced in-house), anti-mouse Sca1-PE, anti-mouse CD31-PE (1/1000; eBiosciences<sup>™</sup>, San Diego, CA, USA), and Hoechst (1/1000; Sigma-Aldrich) diluted in PBS containing 5% FBS, by incubating at 4°C for 10-15 min. Afterwards, cells were passed through 30 µm filters (CellTrics<sup>®</sup>, Norderstedt, Germany). Stained MuSCs were separated from rest of the cells on a MoFlo cytometer (DakoCytomation, Glostrup, Denmark) equipped with three lasers. Sorting gates were strictly defined based on single antibody-stained control cells as well as the forward and side-scatter patterns of MuSCs. Dead cells and debris were excluded by detection of Hoechst staining. Fluorescence-activated cell sorting purified MuSCs were α7-integrin<sup>+</sup>, CD31<sup>-</sup>, and Sca1<sup>-</sup>.

### ***In situ* mechanical loading of muscle stem cells**

The myofiber bundles (n=8) were mounted at their slack length (low strain) by attaching the tendons at both ends to small rods in chambers (Bioptechs, Butler, PA, USA; see Fig. S1) containing tyrode solution (NaCl 7.5 g/l; KCl 0.35 g/l; MgCl<sub>2</sub>·6H<sub>2</sub>O 0.214 g/l; NaH<sub>2</sub>PO<sub>4</sub>·H<sub>2</sub>O 0.058 g/l; NaHCO<sub>2</sub> 1.7 g/l; CaCl<sub>2</sub>·H<sub>2</sub>O 0.2 g/l) which was saturated with a carbogen gas mixture (95% O<sub>2</sub> and 5% CO<sub>2</sub>) at 37°C. To induce a high strain on the myofiber bundle, the bundle was stretched by ~40% above slack length (i.e. high strain).

### ***In situ* image acquisition**

Images were acquired on a Zeiss Axioscope (Oberkochen, Germany) using a 7MP multiphoton system with Vision II and MPX (Chameleon, Santa Clara, CA, USA) lasers and a 20x water dipping objective (NA 1.0). The Vision II laser was tuned to 890 nm (range: 880-900 nm), and the MPX laser to 1200 nm with reflected emissions captured by non-descanned photomultiplier detectors (channel 1 and 2), GaAsP BiG detector (channel 3), or transmitted light detector (channel 4). Emission filters used were shortpass 485 nm (channels 1 and 4), bandpass 500-550 (channel 2), and bandpass 575-610 (channel 3). The signals detected were second harmonic (channel 1), GFP (channel 2), and tdTomato (channel 3). Image stacks were acquired every ~1  $\mu\text{m}$  in Z direction.

### **Image analysis**

Cells were segmented in the Medical Imaging Interaction Toolkit (MITK, [www.mitk.org](http://www.mitk.org)) for 3D reconstruction. Analysis of cellular parameters, i.e. sarcomere length, cell length, cell width, cell aspect-ratio (major axis/minor axis), and cell roundness ( $4 \times ([\text{area}]) / (\pi \times [\text{major axis}]^2)$ ) were performed in ImageJ, version 1.52h (Wayne Rasband, National Institutes of Health, Bethesda, MD, USA). Tensile strain was calculated by the change in length ( $\Delta L$ ) divided by the initial length ( $L_0$ ) in XY plane ( $\Delta L/L_0$ ). Shear strain was quantified by measuring the difference in change in length ( $\Delta L$ ) of the two lateral sides of the cell, and the change in angle between both lateral sides in the YZ plane (shear angle).

### **Cell culture**

For *in vitro* mechanical loading by PFSS, MuSCs were expanded on matrigel (Corning, Bedford, MA, USA)-coated culture flasks with growth medium consisting of Ham's F-10 Nutrient Mix (Gibco, Paisley, UK) supplemented with 20% FBS (Gibco), 10  $\mu\text{g}/\text{ml}$  penicillin (Sigma-Aldrich, St. Louis, MO, USA), 10  $\mu\text{g}/\text{ml}$  streptomycin (Sigma-Aldrich), and 2.5  $\text{ng}/\mu\text{l}$  of recombinant

human fibroblast growth factor (R&D systems, Minneapolis, MN, USA), and cultured at 37°C in a humidified atmosphere of 5% CO<sub>2</sub> in air. Upon 70% confluence, cells were harvested using 0.1% trypsin and 0.1% EDTA (Gibco) in PBS.

### **Pulsating fluid shear stress**

MuSCs were seeded at 12-20×10<sup>3</sup>/cm<sup>2</sup> on matrigel (Corning)-coated glass slides (2.5×6.5 cm; n =10), and cultured for 2-4 days. One hour before PFSS, culture medium was refreshed by medium containing a low serum concentration (2% FBS). PFSS was applied as described earlier [13]. Briefly, PFSS was generated by pumping 7 ml of culture medium through a parallel-plate flow chamber containing MuSCs. Cells were subjected to a cyclic changing pressure gradient with a peak shear stress rate of 6.5 Pa/s (pulse amplitude: 1 Pa; pulse frequency: 1 Hz). Static control cells were kept in similar conditions as PFSS loaded cells. After 1 h PFSS treatment or static control culture, images were taken and RNA was isolated. To determine the number of MuSCs detached as a result of PFSS exposure, cells were counted in random images acquired pre and post-PFSS.

### **Nitric oxide analysis**

Medium samples were taken from PFSS-treated and static cell cultures (n = 20) at intervals (10, 30, and 60 min) for NO analysis. NO production was measured as nitrite (NO<sub>2</sub><sup>-</sup>) accumulation in the medium using Griess reagent, and absorbance was measured at 540 nm with a microplate reader (BioRad Laboratories Inc., Veenendaal, The Netherlands) as described earlier [13].

### **RNA isolation and reverse transcription**

After PFSS and static treatment (n=7-10), micrographs were taken, cells were lysed with 700 µl Trizol (Thermo-Fisher Scientific, Carlsbad, CA, USA), and stored at -80°C overnight. Total RNA was isolated using RiboPure™ Kit (Applied Biosystems, Foster City, CA, USA) and quantified

(NanoDrop Technologies, Thermo-Fisher Scientific, Wilmington, DE, USA). mRNA (400 ng) was reverse-transcribed to complementary DNA (cDNA) using a High Capacity RNA-to-cDNA kit (Applied Biosystems).

### Quantitative Real-Time PCR

Real-Time PCR was performed on the StepOne™ Real-Time PCR system (Applied Biosystems). Primers were designed using Universal Probe library from Roche Diagnostics. Data were analyzed using StepOne™ v2.0 software (Applied Biosystems) and normalized relative to 18S ribosomal RNA levels. *Wnt1*, *Wnt3a*, *Wnt5a*, *Wnt7a*, *Wnt10b*, *IL-6*, *Rspo1*, *Dkk1*, *COX2*, *nNOS*, *eNOS*, and *iNOS* transcript levels were measured using Taqman® qPCR using inventoried Taqman® gene expression assays (Applied Biosystems). mRNA levels of 18S, *MyoD*, *Myog*, *c-Fos*, *Cdk4* (Cyclin-dependent kinase 4), *Vangl2*, and *MGF* were measured using SYBR® green (Thermo-Fisher Scientific). Primer sequences used for real-time PCR: 18S (5' GTAACCCGTTGAACCCATT and 5' CCATCCAATCGGTAGTAGCG); *MyoD* (5'CATCCAGCCCGCTCCAAC and 5' GGGCCGCTGTAATCCATCATGCC); *Myog* (5' CCAGCCCATGGTGCCCAAGTGA and 5' CCAGTGCATTGCCCACTCCG); *c-Fos* (5' TCACCCTGCCCTTCTCA and 5' CTGATGCTCTTGACTGGCTCC); *Cdk4* (5' GGGGAAAATCTTTGATCTCATTGGA and 5' AAGGCTCCTCGAGGTAGAGATA); *Vangl2* (5' CCCAGTTCACACTCAAGGT and 5' ACTTGGGCAGGTTGAGGAG); *MGF* (5' GGAGAAGGAAAGGAAGTACATTTG and 5' CCTGCTCCGTGGGAGGCT).

### Statistical analysis

The paired sample t-test was used to test statistical significant differences in MuSC deformation data, the independent t-test to test differences in tensile strain data, and the one-sample t-test to test differences in shear strain data. Differences in NO production data were tested using



ANOVA. One-sample t-test was performed for statistical analysis of gene expression data. Data were expressed as mean  $\pm$  SEM, and  $p < 0.05$  was considered significant.

## RESULTS

### ***Ex vivo* myofiber stretch induced MuSC deformation**

We characterized MuSCs in their niche, within an isolated myofiber bundle from the EDL and SO muscle (Fig. 1). Sarcomere length was  $\sim 2.5 \mu\text{m}$ , slightly above the slack length of sarcomeres as described earlier (Fig. 2A) [17]. Following stretching of EDL myofibers up to  $\sim 40\%$  above their slack length, MuSCs on the host myofiber increased in length by the same magnitude (Fig. 1A-D; Fig. 2C). Similar increases in sarcomere length and MuSC were observed for myofiber bundles from SO muscles (Fig. 1I-L). MuSCs on EDL myofibers displayed clear cell protrusions, whereas those on SO myofibers did not. Mean tensile strain on MuSCs of stretched EDL and SO myofibers was 43%, which was of the same order of magnitude as the increase in strain of the myofibers ( $\sim 40\%$ ; Fig. 2B). In addition to lengthening of MuSCs, filopodia were reoriented in the direction of the stretched myofibers as indicated by the change in position of the processes when the myofibers were stretched compared to slack length (Fig. 1E,F). MuSCs of SO myofibers showed less distinct processes compared to MuSCs of EDL myofibers (Fig. 1M,N). A comparison of the displacement of the lateral sides of the MuSCs in the YZ plane, and changes in the angles between the two lateral sides showed that the MuSCs were also subjected to shear deformation (Fig. 1G,H,O,P). The displacement of the lateral sides of MuSCs differed by  $\sim 40\%$ , and the shear angle showed a 12 degrees-displacement from a fixed axis in both EDL and SO myofibers (Fig. 2D,E).

Stretching of both EDL and SO myofiber bundles induced MuSC compression and decreased MuSC width by  $\sim 21\%$  (Fig. 2F). Changes in cell morphology after stretch indicated an increase in MuSC aspect-ratio, as MuSCs became more elongated while a negative trend in

roundness was noted (Fig. 2G,H). These results showed that MuSCs within their native niche were subjected to tensile and shear forces causing corresponding deformations.

### **MuSCs were mechanosensitive to pulsating fluid shear stress**

Mechanical force-induced deformation of cell shape may induce specific molecular responses by MuSCs, including elevated NO production. We first determined whether PFSS caused detachment of MuSCs from the substratum. Micrographs after static and PFSS treatment indicated that ~15% of MuSCs detached after PFSS treatment, whereas no difference was observed in the static controls (Fig. 3A). As NO is produced by NOS, we assessed whether MuSCs express the different isoforms of NOS (*iNOS*, *eNOS*, *nNOS*). We found that myoblasts express *nNOS* and *iNOS*, but *eNOS* transcripts were not detectable (Fig. 3B). PFSS did not affect the expression of *nNOS*, but an upward trend was seen for *iNOS* mRNA levels after PFSS treatment (Fig. 3B). To assess NO production by MuSCs, NO levels in the culture medium were quantified. PFSS resulted in increased NO production by MuSCs (2-2.5 fold) after 10, 30, and 60 min (Fig. 3C). These results indicated that MuSCs were sensitive to PFSS, and that NO production was most likely related to alterations in iNOS enzyme activity.

### **PFSS upregulated *c-Fos* and *Cdk4* with no effect on *MyoD* and myogenin (*Myog*)**

To assess whether PFSS induces alterations in expression of genes involved in regulating MuSC proliferation and differentiation, we quantified *c-Fos*, *Cdk4*, *MyoD*, and *Myog* mRNA expression. PFSS induced a 4-fold and 1.3-fold increase in *c-Fos* and *Cdk4* transcript levels, respectively (Fig. 4A). MuSCs expressed both *MyoD* and *Myog* with no difference in expression levels between PFSS-treated and static control cells (Fig. 4A). These results showed that PFSS induced expression of *c-Fos* and *Cdk4*, known to promote cell proliferation [18, 19].

### **PFSS upregulated expression of *IL-6*, but not *COX2* and *MGF* in myoblasts**

Exercise induces *IL-6* expression in myofibers, which is involved in myoblast proliferation and regeneration [20]. *IL-6* production is stimulated by both NO and COX2-mediated prostaglandin production [21]. COX2 and mechano growth factor (MGF) are also essential for myoblast proliferation and differentiation [22, 23]. Therefore we determined the effect of PFSS on *IL-6*, COX2, and *MGF* expression in MuSCs. PFSS induced a 2-fold increase in *IL-6* expression and an upward trend towards increased COX2 expression, but did not affect *MGF* expression (Fig. 4B).

### **PFSS did not affect Wnt signaling**

Wnt1 has been shown to stimulate MuSC proliferation [24]. To investigate the effect of PFSS on Wnt signaling within MuSCs, we evaluated the effect of PFSS on components of the Wnt signaling pathway (Wnt1, Wnt3a, and Wnt5a) and regulators of Wnt signaling, i.e. Rspo1 and Dickkopf-related protein 1 (*Dkk1*) [25]. PFSS did not affect *Wnt1* gene expression, while an upward trend was seen in *Wnt5a* mRNA levels (Fig. 4C). *Wnt3a* was undetectable, and *Rspo1*, a positive regulator of Wnt activity, was unchanged by PFSS, while *Dkk1*, a negative regulator, was undetectable (Fig. 4C). These results indicated that the Wnt signaling pathway was not affected by mechanical stimuli in MuSCs.

### **PFSS did not alter expression of planar cell polarity genes**

Wnt5a is implicated in mediating membrane protein *Vangl2* phosphorylation and activation [26], known to affect the PCP pathway that is crucial for cell division and cell migration. We determined whether PFSS induced expression of *Vangl2* and showed that *Vangl2* expression was not affected by PFSS treatment (Fig. 4D). We further tested the effect of PFSS on *Wnt7a* and *Wnt10b* expression, which are involved in self-renewal and myogenic commitment of MuSCs. *Wnt7a* transcripts were not detectable in MuSCs, and *Wnt10b* expression was not

affected by PFSS (Fig. 4D). Therefore, PFSS did not affect expression of genes involved in PCP formation in MuSCs.

## **DISCUSSION**

MuSCs within their native niche on the host myofiber with an intact endomysium, are presumed to undergo deformations when the myofibers are subjected to tensile strain. Here we have shown for the first time that MuSCs underwent both tensile strain and shear loading in response to myofiber strain. Due to constancy of myofiber volume, the endomysium surrounding the myofiber will undergo a reorientation from a longitudinal towards a more radial orientation upon muscle contraction [27]. Since MuSCs are anchored to the basal lamina and the sarcolemma of the host myofiber, one may expect that these cells also align in the orientation of basal lamina. Our data confirms such re-orientation of MuSCs with respect to the longitudinal axis of the myofibers.

Local differences in the stiffness of the endomysium may occur due to the presence of capillaries and differences in type of collagen and/or connective tissue content. These differences will cause shear loads and shear deformation of MuSCs upon mechanical loading of skeletal muscle. In both myofiber bundles of EDL and SO, we observed differences in lateral displacements along the length of MuSCs. This indicates that MuSCs are subjected to shear loading during myofibers stretch-shortening cycles. Mechanical loading of skeletal muscle may also cause localized changes in intramuscular pressure due to the movement of interstitial fluid, thus creating regions of different pressure gradients [28]. These pressure gradients potentially cause compression of MuSCs and result in altered cellular osmotic pressure and volume of MuSCs due to water efflux [29]. Osmotic pressure is a well-known regulator of mechanotransduction, implying that deformation of MuSCs by myofiber stretching induces activity in this manner.

Stretch of MuSCs results in the production of factors involved in MuSC activation, self-renewal, and proliferation [30]. We observed that shear-loading of MuSCs induced NO production and upregulated expression of *c-Fos*, *Cdk4*, and *IL-6*. NO is known to release hepatocyte growth factor (HGF) from the ECM and to mediate MuSC activation, proliferation, and fusion [30]. Since an upward trend in *iNOS* mRNA levels following PFSS application was observed, it is likely that *iNOS* is involved in PFSS-induced NO production in MuSCs. *c-Fos* is an early response gene and plays an important role in cell growth, proliferation, and differentiation [31]. During differentiation, *c-Fos* is repressed by *MyoD* and *Myog* [32, 33]. *c-Fos* is a subunit of transcription factor complex activator protein-1 (AP-1) [34], that binds to the *myoD* promoter and inhibits *MyoD* transcription in proliferating myoblasts [35]. Overexpression of *c-Fos* has been shown to promote proliferation and inhibit differentiation in C2C12 myoblasts [36]. This suggests that increased *c-Fos* expression after shear-loading may induce MuSC proliferation. Moreover, CDK4 has been shown to play a role in cell cycle progression together with D-type cyclins [19]. *IL-6* is essential for muscle regeneration and MuSC proliferation [20]. Muscle injury causes *IL-6* production by macrophages and myofibers [4]. In this study, increased *IL-6* expression by shear-loaded MuSCs suggests a positive effect of loading on MuSC proliferation, and indicates that *IL-6* may act in both a paracrine as well as an autocrine manner to induce MuSC proliferation. Moreover, expression of *COX2*, which is induced in response to injury and is involved in prostaglandin production and MuSC proliferation, also showed an upward trend after shear loading. Another important factor driving MuSC differentiation is MGF, which is induced in myotubes by PFSS [13]. We did not observe changes in *MGF* expression in MuSCs due to PFSS suggesting that mechanical loading for 1 h does not induce autocrine MGF signaling, whereas it does in differentiated myotubes [13]. This suggests that PFSS enhances expression of genes associated with proliferation.

Shear-loading did not affect expression of genes associated with differentiation of myoblasts, as indicated by unaltered *MyoD* and *Myog* expression. Members of the Wnt family

also govern MuSC function. Exogenous Wnt1 activates *Myf5* expression, resulting in MuSC activation and/or proliferation, as shown in rhabdomyosarcomas [37, 38]. Moreover, Wnt3a is required for both myogenic potential and differentiation of MuSCs [39]. We show that that *Wnt1* mRNA levels were unaltered in response to PFSS in MuSCs, whereas *Wnt3a* was not detectable in both controls and PFSS-treated cells. Wnt5a overexpression has also been shown to increase MuSC proliferation [40]. We show that MuSCs upregulate *Wnt5a* mRNA levels in response to PFSS, but the increase did not reach statistical significance. Wnt signaling may also be regulated by negative or positive mediators. *Rspo1* mediates canonical Wnt signaling thereby affecting MuSC differentiation [41]. However, we did not observe changed *Rspo1* expression by PFSS. *Dkk1*, a negative regulator of Wnt signaling, was not detectable in MuSCs, suggesting that there was only a limited response by canonical Wnt signaling to PFSS, possibly involving upregulation of *Wnt5a*.

Wnt7a induces symmetric expansion of MuSCs by activating the PCP pathway through regulation of *Vangl2*, and is negatively regulated by *Rspo1* [25, 42]. We did not detect *Wnt7a* expression in MuSCs, and *Vangl2* expression was unaffected by shear-loading, suggesting that PFSS did not affect PCP signaling in MuSCs. Wnt10b is involved in determining myogenic commitment of MuSCs as its ablation has been shown to decrease MuSC myogenicity [43]. PFSS did not alter *Wnt10b* expression suggesting no effect by PFSS on myogenic commitment of MuSCs.

## Conclusions

We conclude that MuSCs experience tensile strain, shear strain, and pressure in response to mechanical perturbations of the myofibers to which they are attached, and that mechanotransduction is likely to occur *in vivo* in MuSCs during muscle stretch-shortening. Shear-loading of MuSCs *in vitro* upregulated a number of genes that are known to promote MuSC proliferation (Fig. 5A,B). Fate mapping of MuSCs subjected to PFSS will further reveal

whether this acts as a cue to induce MuSC proliferation and/or differentiation. Note that we observed that stretching of MuSCs also affected their cellular processes, thus potentially affecting their ability to migrate. Extended time-lapsed imaging of cells will therefore reveal how exposure to tensile and shear strain regulates MuSC proliferation, differentiation, and migration. This will provide important insight into how MuSCs respond to such forces in the context of ageing and disease, and how this affects their ability to maintain effective muscle function.

## **ABREVIATIONS**

AP-1: Activator protein-1

Ca<sup>2+</sup>: Calcium

Cdk4: Cyclin-dependent kinase 4

COX2: Cyclooxygenase-2

Dkk1: Dickkopf-related protein 1

DMEM: Dulbecco's Modified Eagle Medium

ECM: Extracellular matrix

EDL: Extensor digitorum longus

eNOS: Endothelial nitric oxide synthase

FBS: Fetal bovine serum

HGF: Hepatocyte growth factor

IL-6: Interleukin-6

iNOS: Inducible nitric oxide synthase

mG: membrane targeted green fluorescent protein

MGF: Mechano growth factor

MITK: Medical Imaging Interaction Toolkit

mT: Membrane-targeted tandem dimer Tomato

MuSCs: Muscle stem cells

MyoD: Myogenic differentiation

Myog: Myogenin

nNOS: Neuronal nitric oxide synthase

NO: Nitric oxide

NO<sub>2</sub><sup>-</sup>: Nitrite

NOS: nitric oxide synthase

Pax7: Paired box 7

PCP: Planar cell polarity

PFSS: Pulsating fluid shear stress

Rspo1: R-spondin-1

SO: Soleus

Vangl2: Vang-like protein 2

## **DECLARATIONS**

### **Ethics approval and consent to participate**

Animal procedures were conducted according to the UK Home Office project license P8D5E2773 (KJL) and the guidelines of the European Community and French Veterinary Department, approved by the Sorbonne Université Ethical Committee for Animal Experimentation.

### **Consent for publication**

Not applicable.

### **Availability of data and materials**

All data generated or analysed during this study are included in this published article.



## **Competing interests**

The authors declare that they have no competing interests.

## **Funding**

RDK and RTJ were funded by a Royal Society International Partnership Award (IE150196). KJL was funded by the BBSRC (R015953) and the British Heart Foundation. RDK was funded by the Wellcome Trust (101529/Z/13/Z). FLG was supported by grants from ANR (Agence Nationale pour la Recherche / ANR-14-CE11-0026) and Association Française contre les Myopathies/AFM Telethon to FLG. JJ was funded by the China Scholarship Council (CSC, No. 201608530156). MH was funded by the European Commission through MOVE-AGE, an Erasmus Mundus Joint Doctorate programme (Grant number: 2014-0691).

## **Author contributions**

MH, JJ, KJL, RDK, and RTJ performed the experiments. MH, ADB, CO, and RDK analyzed the data. MH, JJ, and RTJ drafted the manuscript. MH, JKN, ADB, JJ, CO, FLG, LG, KJL, RDK, and RTJ contributed to conceive and plan the experiments, interpret the results, and edited and revised the manuscript.

## **Acknowledgements**

The authors thank Dylan Herzog for technical assistance.

## **REFERENCES**

1. Chakravarthy MV, Davis BS, Booth FW. IGF-I restores satellite cell proliferative potential in immobilized old skeletal muscle. *J Appl Physiol.* 2000;89:1365-79.

2. Chen HX, Tang SP, Gao FT, Xu JL, Jiang XP, Cao J, et al. Fibrosis, adipogenesis, and muscle atrophy in congenital muscular torticollis. *Medicine*. 2014;93:e138.
3. Van der Meer SF, Jaspers RT, Degens H. Is the myonuclear domain size fixed? *J Musculoskelet Neuronal Interact*. 2011;11:286-97.
4. Bentzinger CF, Wang YX, Dumont NA, Rudnicki MA. Cellular dynamics in the muscle satellite cell niche. *EMBO Rep*. 2013;14:1062-72.
5. Huijijng PA, Jaspers RT. Adaptation of muscle size and myofascial force transmission: a review and some new experimental results. *Scand J Med Sci Sports*. 2005;15:349-80.
6. Conboy IM, Conboy MJ, Wagers AJ, Girma ER, Weissman IL, Rando TA. Rejuvenation of aged progenitor cells by exposure to a young systemic environment. *Nature*. 2005;433:760-4.
7. Yucesoy CA, Koopman BH, Huijijng PA, Grootenboer HJ. Three-dimensional finite element modeling of skeletal muscle using a two-domain approach: linked fiber-matrix mesh model. *J Biomech*. 2002;35:1253-62.
8. Jaspers RT, Brunner R, Pel JJ, Huijijng PA. Acute effects of intramuscular aponeurotomy on rat gastrocnemius medialis: force transmission, muscle force and sarcomere length. *J Biomech*. 1999;32:71-9.
9. Jaspers RT, Brunner R, Baan GC, Huijijng PA. Acute effects of intramuscular aponeurotomy and tenotomy on multitendoned rat EDL: indications for local adaptation of intramuscular connective tissue. *Anat Rec*. 2002;266:123-35.
10. Yin H, Price F, Rudnicki MA. Satellite cells and the muscle stem cell niche. *Physiol Rev*. 2013;93:23-67.
11. Boers HE, Haroon M, Le Grand F, Bakker AD, Klein-Nulend J, Jaspers RT. Mechanosensitivity of aged muscle stem cells. *J Orthop Res*. 2018;36:632-41.

12. Tidball JG, Lavergne E, Lau KS, Spencer MJ, Stull JT, Wehling M. Mechanical loading regulates NOS expression and activity in developing and adult skeletal muscle. *Am J Physiol.* 1998;275:C260-6.
13. Juffer P, Bakker AD, Klein-Nulend J, Jaspers RT. Mechanical loading by fluid shear stress of myotube glycocalyx stimulates growth factor expression and nitric oxide production. *Cell Biochem Biophys.* 2014;69:411-9.
14. Buono R, Vantaggiato C, Pisa V, Azzoni E, Bassi MT, Brunelli S, et al. Nitric oxide sustains long-term skeletal muscle regeneration by regulating fate of satellite cells via signaling pathways requiring Vangl2 and cyclic GMP. *Stem Cells.* 2012;30:197-209.
15. von Maltzahn J, Chang NC, Bentzinger CF, Rudnicki MA. Wnt signaling in myogenesis. *Trends Cell Biol.* 2012;22:602-9.
16. Holguin N, Brodt MD, Silva MJ. Activation of Wnt signaling by mechanical loading is impaired in the bone of old mice. *J Bone Miner Res.* 2016;31:2215-26.
17. Edman KA. Contractile properties of mouse single muscle fibers, a comparison with amphibian muscle fibers. *J Exp Biol.* 2005;208:1905-13.
18. Pai SR, Bird RC. c-fos expression is required during all phases of the cell cycle during exponential cell proliferation. *Anticancer Res.* 1994;14:985-94.
19. Tsutsui T, Hesabi B, Moons DS, Pandolfi PP, Hansel KS, Koff A, et al. Targeted disruption of CDK4 delays cell cycle entry with enhanced p27(Kip1) activity. *Mol Cell Biol.* 1999;19:7011-9.
20. Serrano AL, Baeza-Raja B, Perdiguero E, Jardi M, Munoz-Canoves P. Interleukin-6 is an essential regulator of satellite cell-mediated skeletal muscle hypertrophy. *Cell Metab.* 2008;7:33-44.
21. Hinson RM, Williams JA, Shacter E. Elevated interleukin 6 is induced by prostaglandin E2 in a murine model of inflammation: Possible role of cyclooxygenase-2. *Proc Natl Acad Sci USA.* 1996;93:4885-90.

22. Makris AC, Sotzios Y, Zhou Z, Makropoulou M, Papapetropoulos N, Zacharatos P, et al. Nitric oxide stimulates interleukin-6 production in skeletal myotubes. *J Interferon Cytokine Res.* 2010;30:321-7.
23. Otis JS, Burkholder TJ, Pavlath GK. Stretch-induced myoblast proliferation is dependent on the COX2 pathway. *Exp Cell Res.* 2005;310:417-25.
24. Otto A, Schmidt C, Luke G, Allen S, Valasek P, Muntoni F, et al. Canonical Wnt signalling induces satellite-cell proliferation during adult skeletal muscle regeneration. *J Cell Sci.* 2008;121:2939-50.
25. Binnerts ME, Kim KA, Bright JM, Patel SM, Tran K, Zhou M, et al. R-Spondin1 regulates Wnt signaling by inhibiting internalization of LRP6. *Proc Natl Acad Sci USA.* 2007;104:14700-5.
26. Yang Y. Wnt signaling in development and disease. *Cell Biosci.* 2012;2:14.
27. Purslow PP, Trotter JA. The morphology and mechanical properties of endomysium in series-fibred muscles: variations with muscle length. *J Muscle Res Cell Motil.* 1994;15:299-308.
28. Evertz LQ, Greising SM, Morrow DA, Sieck GC, Kaufman KR. Analysis of fluid movement in skeletal muscle using fluorescent microspheres. *Muscle Nerve.* 2016;54:444-50.
29. Delarue M, Monte F, Vignjevic D, Prost J, Joanny JF, Cappello G. Compressive stress inhibits proliferation in tumor spheroids through a volume limitation. *Biophys J.* 2014;107:1821-8.
30. Tatsumi R. Mechano-biology of skeletal muscle hypertrophy and regeneration: possible mechanism of stretch-induced activation of resident myogenic stem cells. *Anim Sci J.* 2010;81:11-20.
31. Milde-Langosch K. The Fos family of transcription factors and their role in tumourigenesis. *Eur J Cancer.* 2005;41:2449-61.

32. Trouche D, Grigoriev M, Lenormand JL, Robin P, Leibovitch, SA, Sassone-Corsi P, et al. Repression of c-fos promoter by MyoD on muscle cell differentiation. *Nature*. 1993;363:79-82.
33. Trouche D, Masutani H, Groisman R, Robin P, Lenormand JL, Harel-Bellan A. Myogenin binds to and represses c-fos promoter. *FEBS Lett*. 1995;361:140-4.
34. Curran T, Franza BR, Jr. Fos and Jun: the AP-1 connection. *Cell*. 1988;55:395-7.
35. Pedraza-Alva G, Zingg JM, Jost JP. AP-1 binds to a putative cAMP response element of the MyoD1 promoter and negatively modulates MyoD1 expression in dividing myoblasts. *J Biol Chem*. 1994;269:6978-85.
36. Hou L, Zhu L, Li H, Jiang F, Cao L, Hu CY, et al. MiR-501-3p forms a feedback loop with FOS, MDFI, and MyoD to regulate c2c12 myogenesis. *Cells*. 2019;8:573.
37. Williamson D, Selfe J, Gordon T, Lu YJ, Pritchard-Jones K, Murai K, et al. Role for amplification and expression of glypican-5 in rhabdomyosarcoma. *Cancer Res*. 2007;67:57-65.
38. Tajbakhsh S, Borello U, Vivarelli E, Kelly R, Papkoff J, Duprez D, et al. Differential activation of Myf5 and MyoD by different Wnts in explants of mouse paraxial mesoderm and the later activation of myogenesis in the absence of Myf5. *Development*. 1998;125:4155-62.
39. Tanaka S, Terada K, Nohno T. Canonical Wnt signaling is involved in switching from cell proliferation to myogenic differentiation of mouse myoblast cells. *J Mol Signal*. 2011;6:12.
40. Otto A, Schmidt C, Luke G, Allen S, Valasek P, Muntoni F, et al. Canonical Wnt signalling induces satellite-cell proliferation during adult skeletal muscle regeneration. *J Cell Sci*. 2008;121:2939-50.

41. Lacour F, Vezin E, Bentzinger CF, Sincennes MC, Giordani L, Ferry A, et al. R-spondin1 controls muscle cell fusion through dual regulation of antagonistic Wnt signaling pathways. *Cell Rep.* 2017;18:2320-30.
42. Le Grand F, Jones AE, Seale V, Scime A, Rudnicki MA. Wnt7a activates the planar cell polarity pathway to drive the symmetric expansion of satellite stem cells. *Cell Stem Cell.* 2009;4:535-47.
43. Vertino AM, Taylor-Jones JM, Longo KA, Bearden ED, Lane TF, McGehee RE Jr, et al. Wnt10b deficiency promotes coexpression of myogenic and adipogenic programs in myoblasts. *Mol Biol Cell.* 2005;16:2039-48.

## ADDITIONAL FILES

### Additional file 1:

**Figure S1.** Chamber for incubation of myofiber bundle at slack length or high strain, consisting of a glass bottom and adjustable platinum rods.

File name: Haroon et al Additional file 1

File format: Microsoft Word Document (.docx)

Title of data: Supplemental Information

Description of data: Contains supplementary Figure S1 legend.

## FIGURE LEGENDS

**Figure 1.** Live cell imaging of MuSCs within their niche at slack length and high strain myofiber bundles. (A, B, I, J) Micrographs of typical MuSCs in their native niche within myofiber bundle at

slack length and at high strain (~40% above slack length) from extensor digitorum longus (EDL) soleus muscles. (C, D, K, L) Measurement of MuSC length change in the XY plane. White lines: length of MuSCs at myofiber bundle slack length. Red arrows: increase in length at extended myofiber bundle length. (E-H, M-P) 3D-reconstructions of MuSCs at slack length and high myofiber strain illustrating MuSC shear deformations in XY and YZ planes. Stretching of the myofiber bundles caused displacement of cell regions (red circles) in the direction indicated by the arrows (red) in the XY plane implicating shearing of MuSC (E, F). (G, H, O, P) Differences in MuSC length changes at both lateral sides indicate an increase in shear angle (i.e. angle of the dashed lines in YZ plane). Scale bar, 20  $\mu\text{m}$ .

**Figure 2.** Quantification of myofiber stretch-induced compression, strain, and shearing of MuSCs. (A) Increase in sarcomere length upon EDL and SO myofiber bundle stretch. (B) Myofiber bundle sarcomere strain and MuSC strain were similar. (C) MuSC length at myofiber bundle slack length and high strain. (D) MuSCs experienced shear strain upon myofiber bundle stretch. (E) At high strain, the shear angle between the two lateral sides of the cell also changed by 12 degrees. (F-H) Myofiber stretch decreased cell width and increased MuSC aspect ratio, but did not affect MuSC roundness.  $n=6-8$  cells. Btw; between. \*Significant effect of stretch,  $p<0.05$ .

**Figure 3.** Pulsating fluid shear stress induced NO production and elevated *iNOS* expression in primary MuSCs. (A) Micrographs of cultured primary mouse MuSCs at 1 h post static and PFSS treatment indicate ~15% loss of cells due to PFSS application. (B) PFSS did not change the expression of *nNOS*, while *eNOS* was not detectable, and PFSS caused an upward trend in the level of *iNOS* mRNA transcripts. (C) PFSS induced NO production at 10, 30, and 60 min by 2-2.5 fold.  $n=20$ . PFSS, pulsating fluid shear stress; ND, not detectable. \*Significant effect of PFSS,  $p<0.05$ . Scale bar, 200  $\mu\text{m}$ .

**Figure 4.** PFSS upregulated proliferation marker expression, i.e. *c-Fos*, *Cdk4*, and *IL-6*, in primary mouse MuSCs. (A) PFSS upregulated *c-Fos* expression by 4-fold, and *Cdk4* expression by 1.3-fold, but did not affect *MyoD* and *Myog* mRNA expression. (B) *IL-6* was upregulated by 2-fold after PFSS and an upward trend was observed in *COX2* expression, while no effect was shown on *MGF* by PFSS. (C) *Wnt5a* transcripts were slightly, but not significantly, upregulated, *Wnt1* and *Rspo1* expression remained unchanged, while *Wnt3a* and *Dkk1* were undetectable in both static and PFSS-treated cells. (D) PFSS did not affect *Vangl2* and *Wnt10b* expression, whereas *Wnt7a* was not detectable. n=7-10. PFSS, pulsating fluid shear stress; ND, not detectable. \*Significant effect of PFSS, p<0.05.

**Figure 5.** Schematic of myofiber stretch inducing MuSC deformation, and effect of fluid shear stress on myoblast mRNA expression. (A) MuSC in its niche on the host myofiber, embedded between the sarcolemma (yellow) and basal lamina (grey), and connected via transmembrane complexes, undergoing tensile strain and shear stress deformations upon myofiber stretch. (B) Myoblasts subjected to mechanical load by PFSS *in vitro* induce upregulation of NO and expression of factors known to promote proliferation.



## EDL muscle

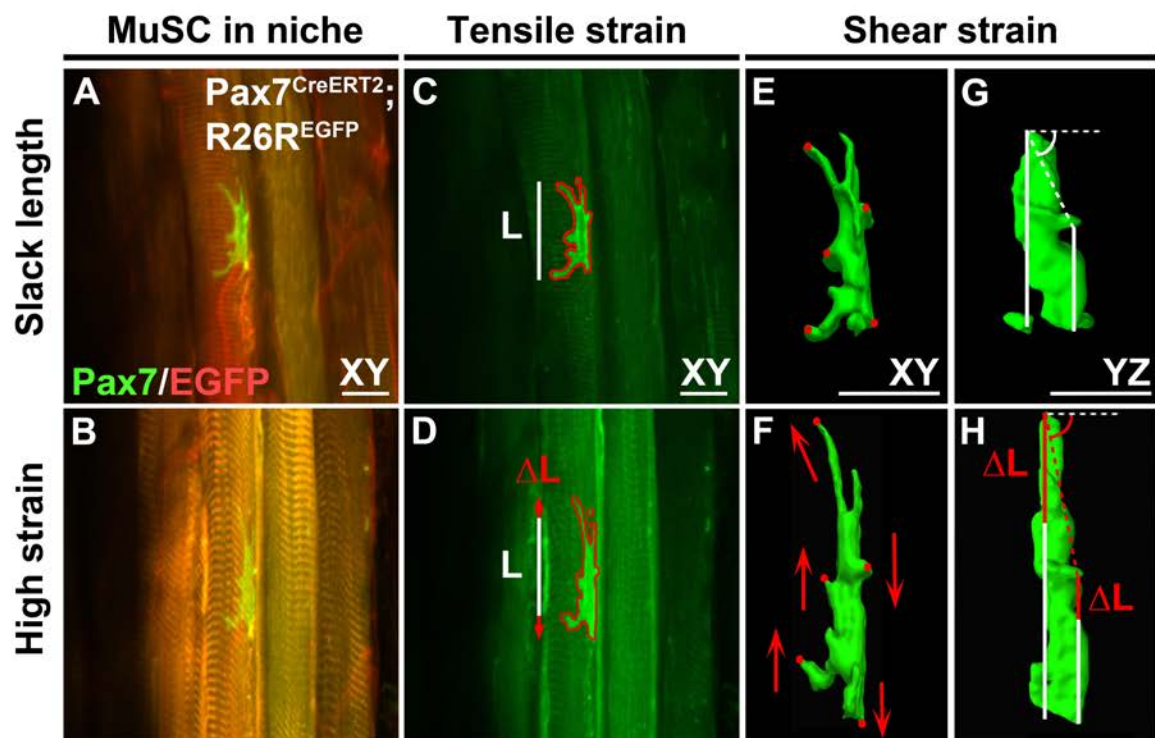

## Soleus muscle

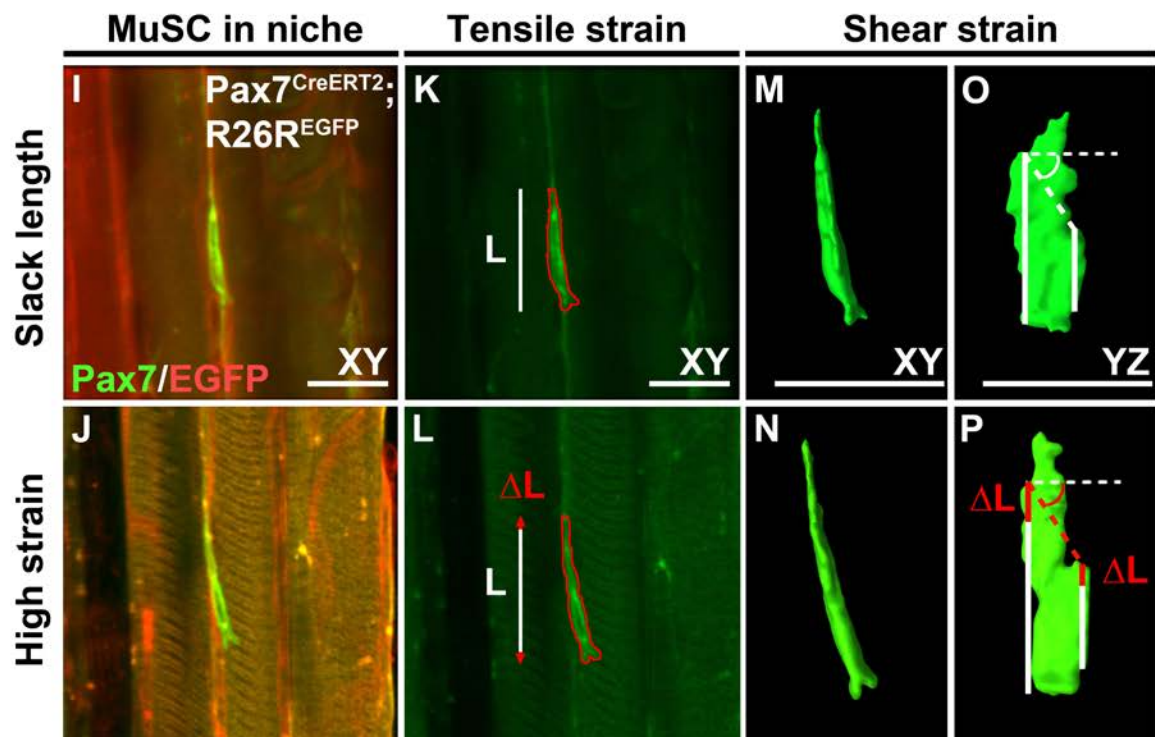

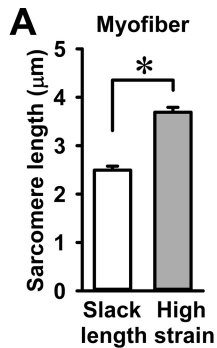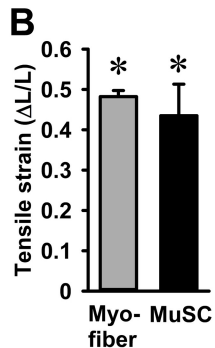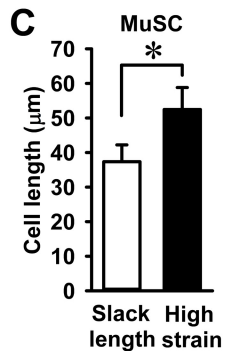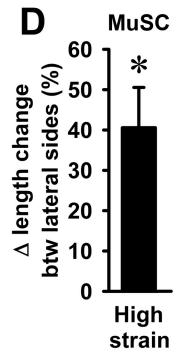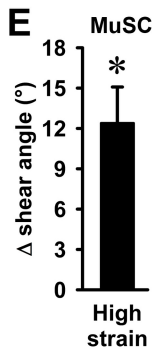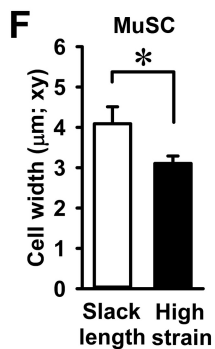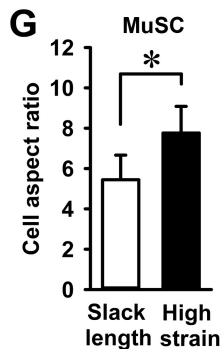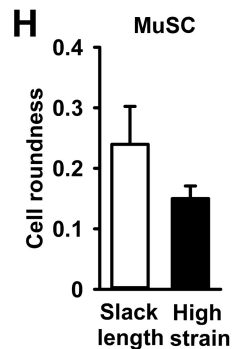

**A**  
**Static**  
**PFSS**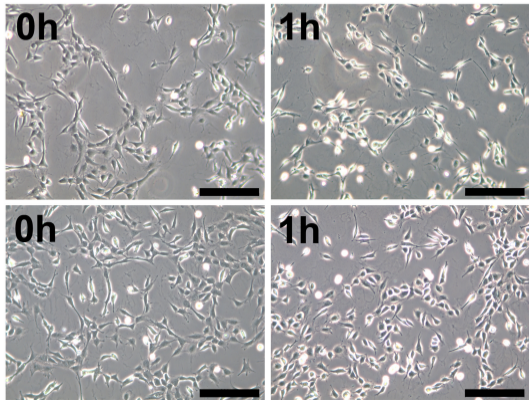**B**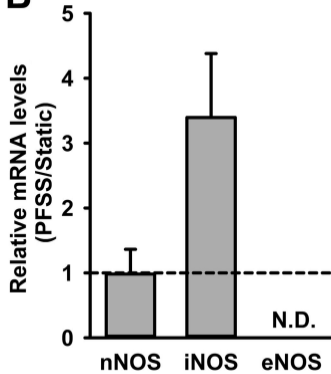**C**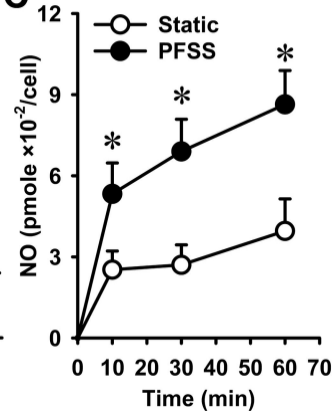

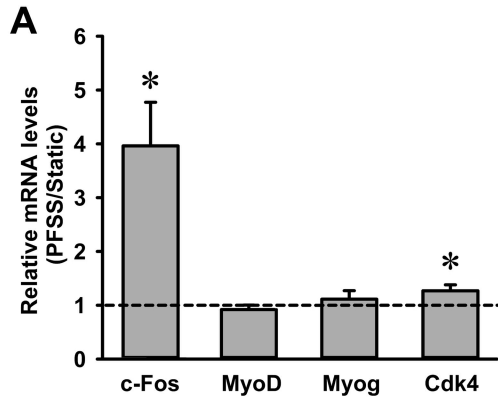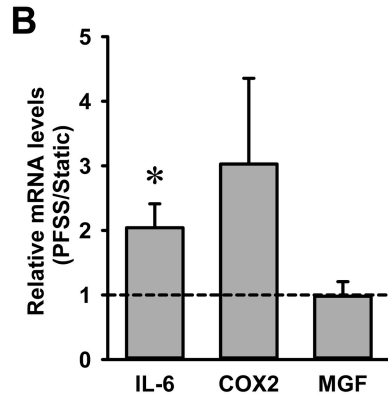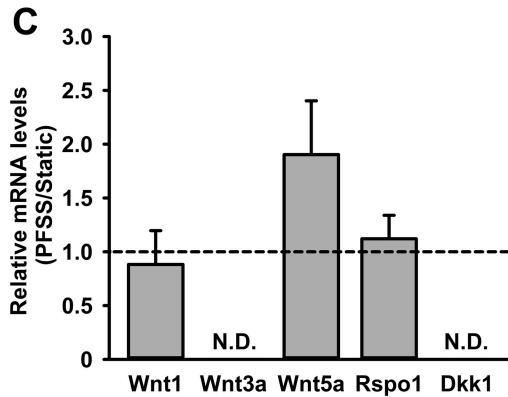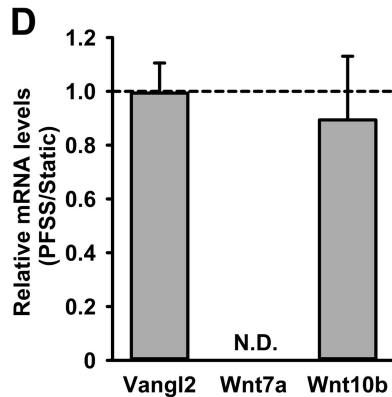

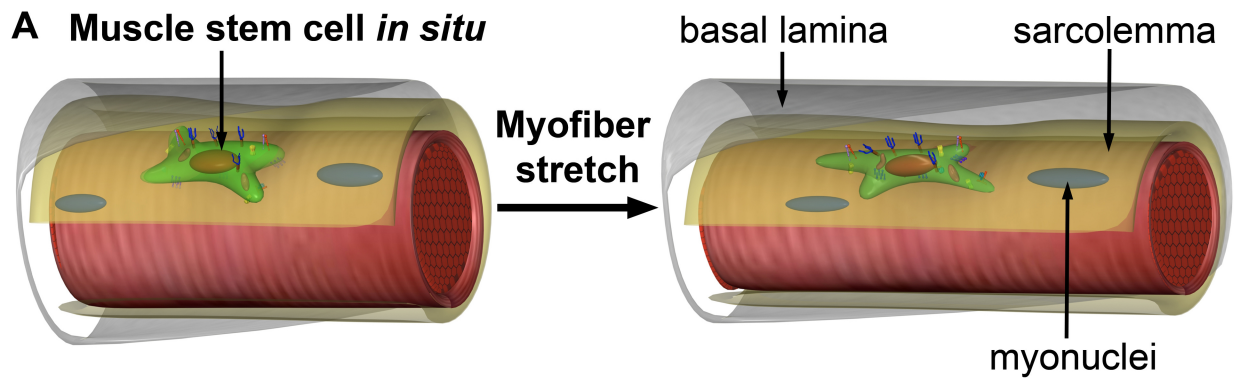

**B Muscle stem cells *in vitro***

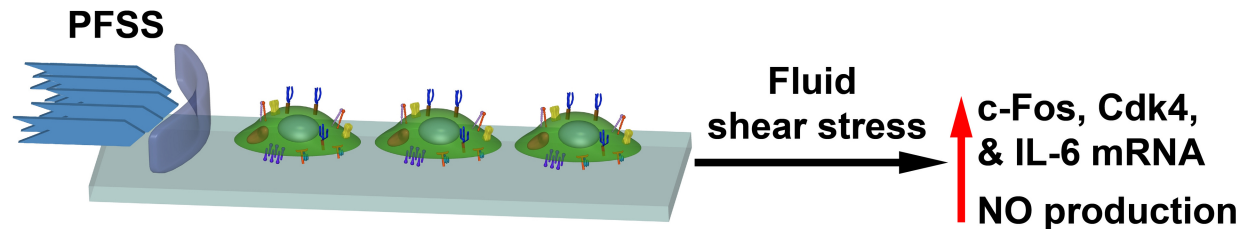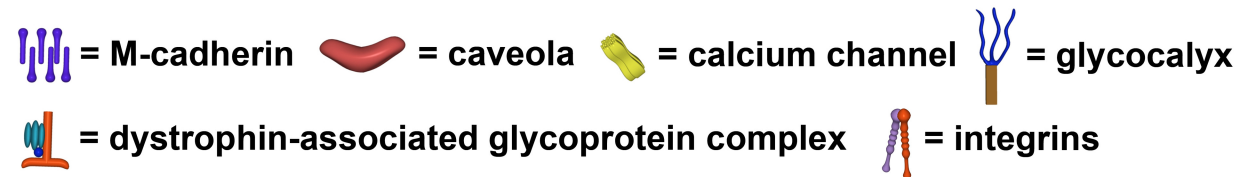

Source: https://www.biorxiv.org/content/biorxiv/early/2020/01/14/2020.01.14.902510.full.pdf
